# Supplementary material
Source: PubMed Central journal article supplement (PMC5984145)
Supplement: 2017-0053-1-at.pdf [file 2017-0053-1-at.pdf]

Appendix 1. International Statistical Classification of Diseases and Related Health Problems, 10th Revision, Canada (ICD-10-CA) Diagnostic Code Definitions

| Condition                             | ICD-10-CA Diagnostic Code                                       |
|---------------------------------------|-----------------------------------------------------------------|
| Arthritis and related disorders       | M00-03, M05-19, M22-25, M32-36, M45-48, M70-71, M75-77 M79, M99 |
| Chronic obstructive pulmonary disease | J40-44, J47                                                     |
| Congestive heart failure              | I50                                                             |
| Diabetes                              | E10-14                                                          |
| Neoplasm                              | C00-97                                                          |
| Psychiatric conditions                | F20-29, F31-33, F40-41, F50, F60-62                             |
| Renal failure                         | N17-19                                                          |
| Substance-related disorders           | F10-19                                                          |
